# Supplementary material for: Nucleoside phosphocholine amphiphile for in vitro DNA transfection
Source: Royal Society of Chemistry journal article supplement (doi:10.1039/b503302k), 2005-07-22
Supplement: b503302k.pdf [file b503302k.pdf]

## Electronic Supplementary Information

### Nucleoside Phosphocholine Amphiphile for *in vitro* DNA transfection

Louis Moreau,<sup>a</sup> Philippe Barthélémy,<sup>\*a</sup> Dan Luo,<sup>b</sup> Yougen Li,<sup>b</sup>  
Carla A. H. Prata<sup>c</sup> and Mark W. Grinstaff<sup>c</sup>

<sup>a</sup> *Faculté des sciences d'Avignon 33, rue Louis Pasteur, F-84000, Avignon, France. Fax: 33 4 90 14 44 41; Tel: 33 4 90 14 44 65; E-mail: philippe.barthelemy@univ-avignon.fr*

<sup>b</sup> *Department of Biological and Environmental Engineering, Cornell University, Ithaca, New York, 14853. USA.*

<sup>c</sup> *Departments of Biomedical Engineering and Chemistry, Boston University, Boston MA 02215. USA.*

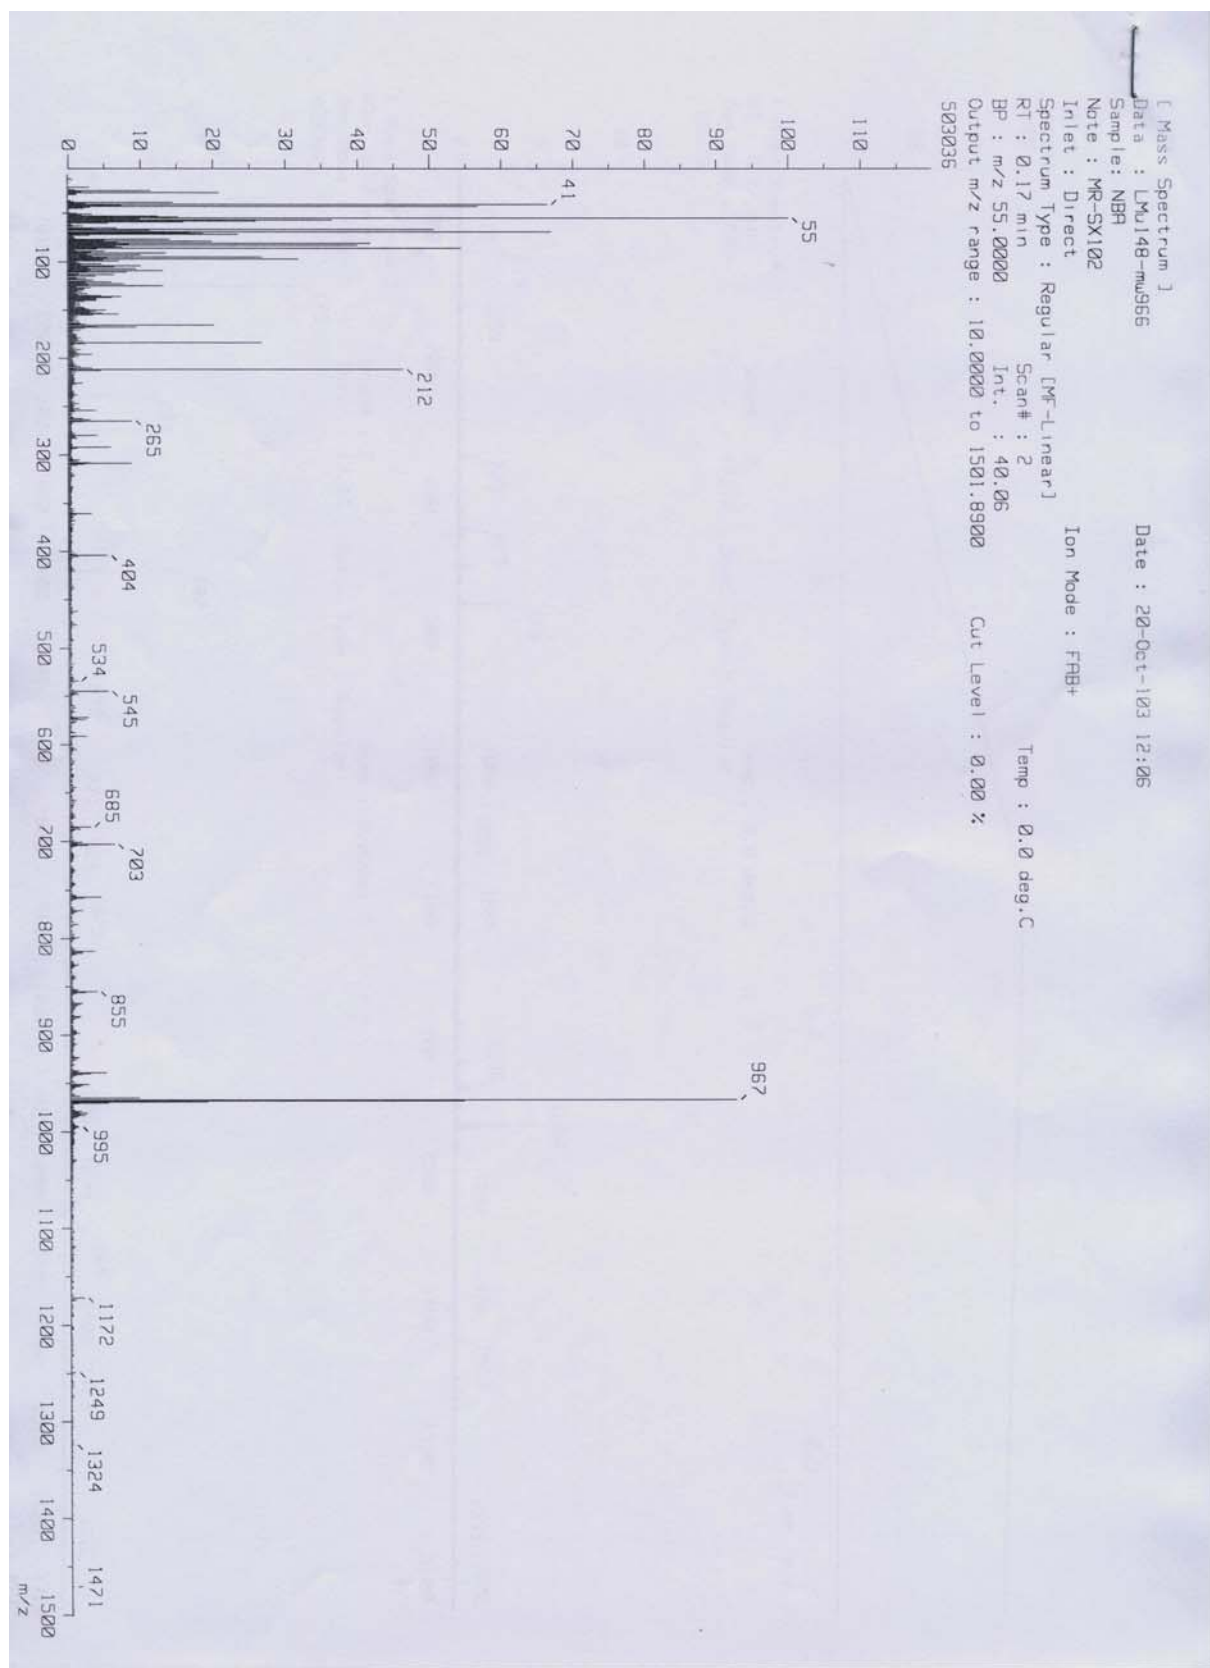

MS FAB<sup>+</sup> of O-Ethyl-bis-(2',3'-oleoyl)-5'-(phosphocholine)-uridine (O-Ethyl DOUPC)

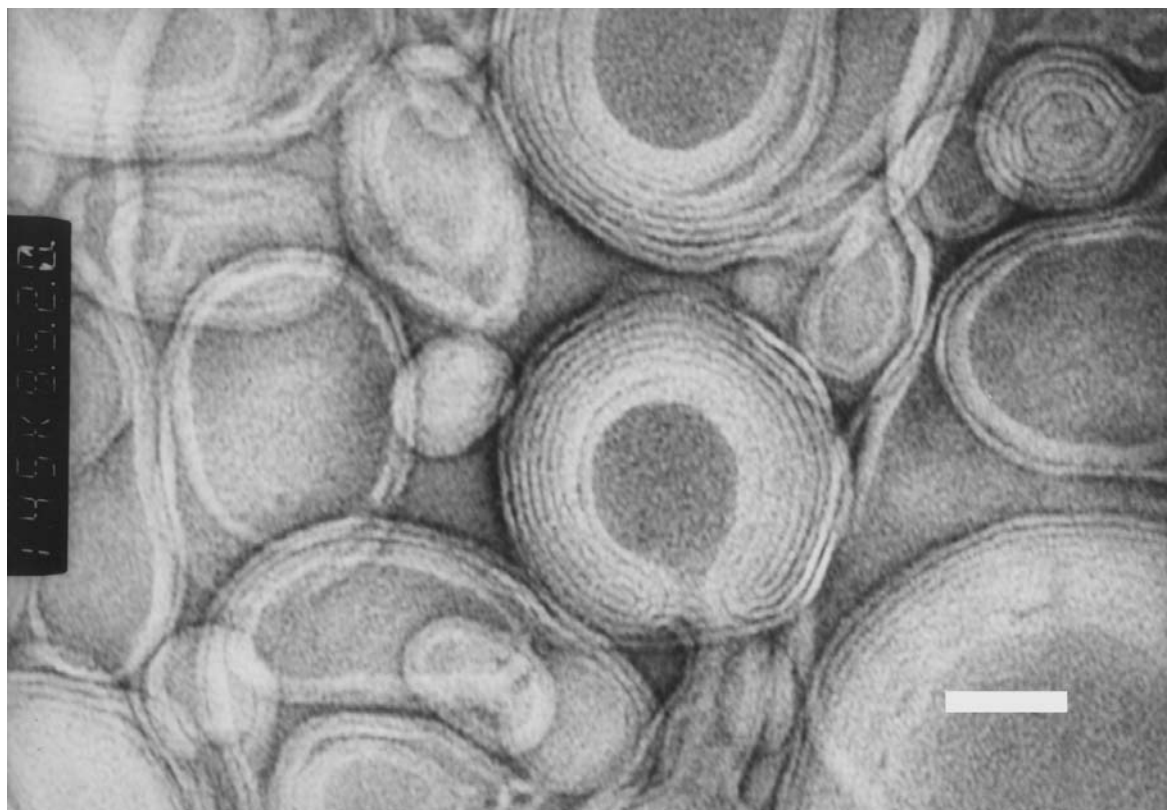

Example of high-resolution TEM images of vesicle of O-Ethyl DOUPC in the presence of Plasmid. Bars = 100 nm

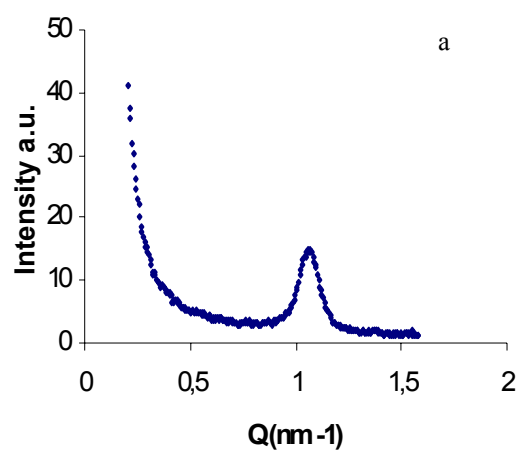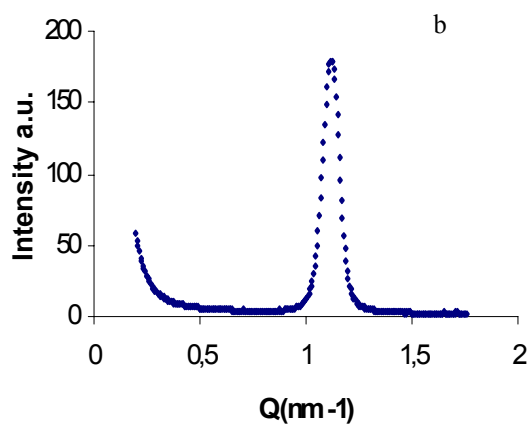

SAXS profiles of a) CT-DNA/DOTAP and b) poly A/DOTAP complexes showing Bragg peaks at  $q$  ( $0.1061 \text{ \AA}^{-1}$ ) and  $q$  ( $0.1131 \text{ \AA}^{-1}$ ), and corresponding lamellar repeat distances  $d$  of 5.92 nm and 5.66 nm, respectively.

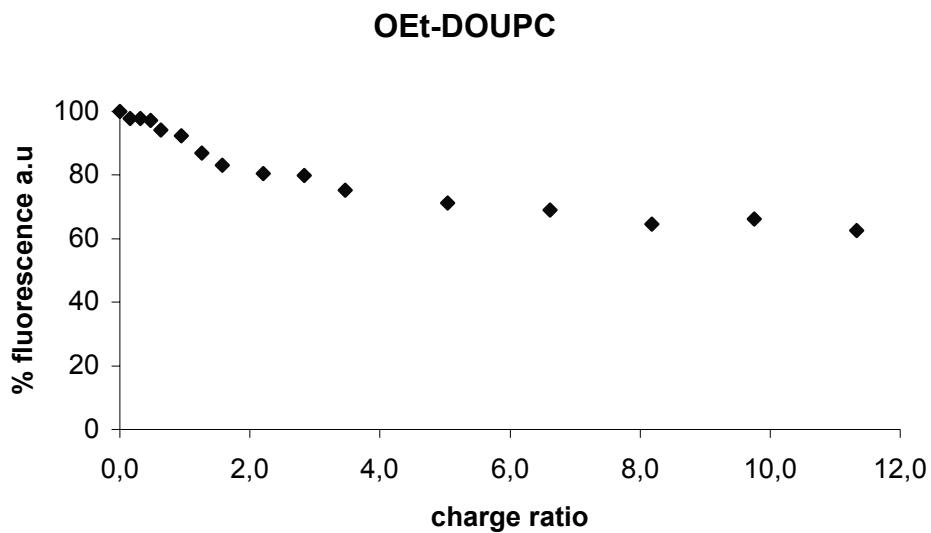

EB exclusion assays with O-Ethyl DOUPC in the presence of CT-DNA (Fluorescence intensity versus charge ratio). The residual fluorescence intensity of 70 % is observed.
